# Supplementary material
Source: PubMed Central journal article supplement (PMC7387157)

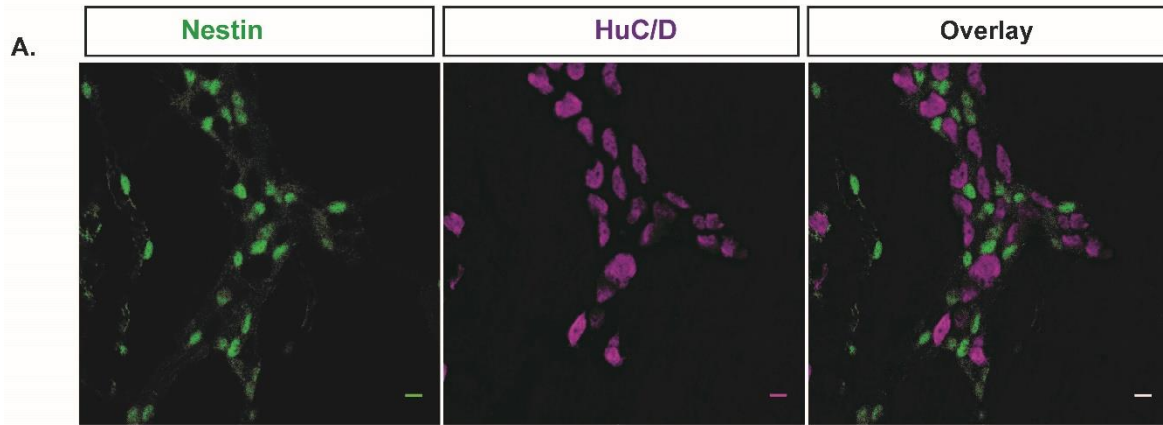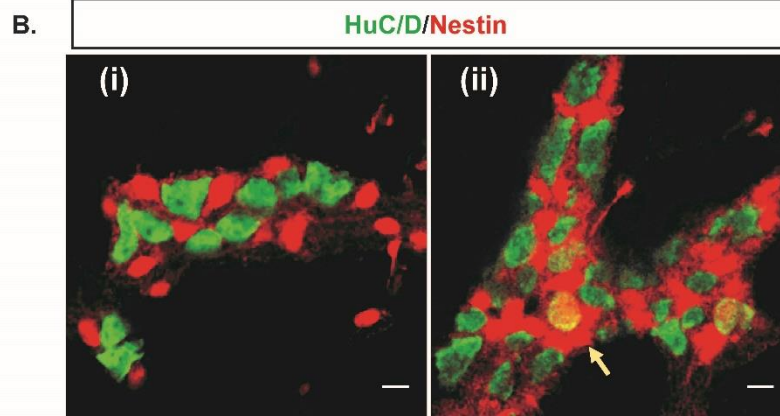

Supplement: NIHMS1580692-supplement-2.pdf [file NIHMS1580692-supplement-2.pdf]

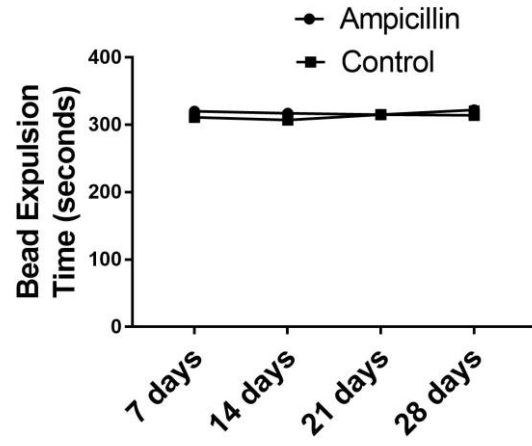

Supplement: NIHMS1580692-supplement-4.pdf [file NIHMS1580692-supplement-4.pdf]

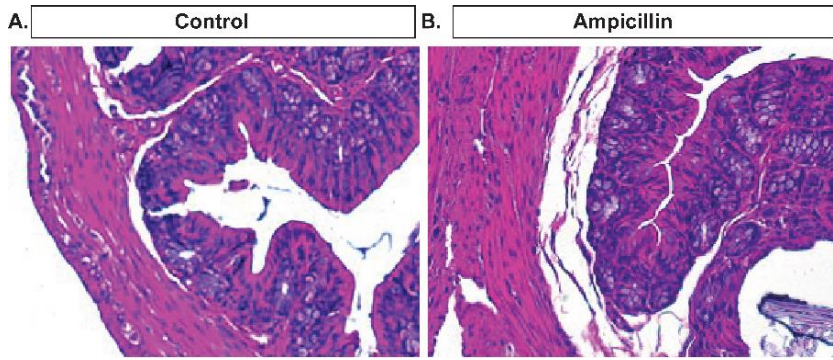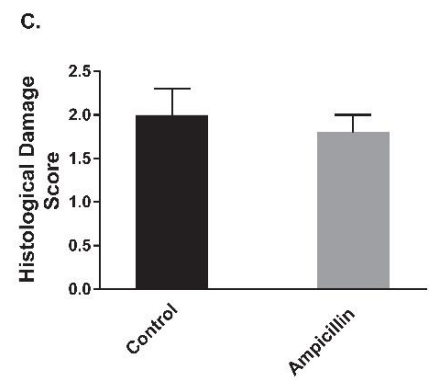

Supplement: NIHMS1580692-supplement-5.pdf [file NIHMS1580692-supplement-5.pdf]

A.

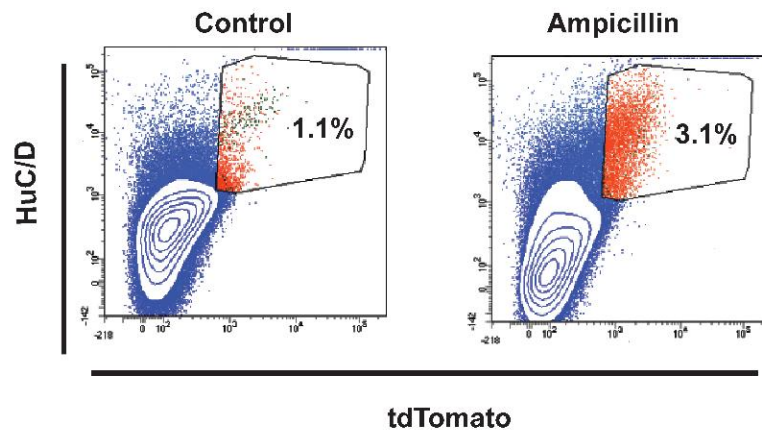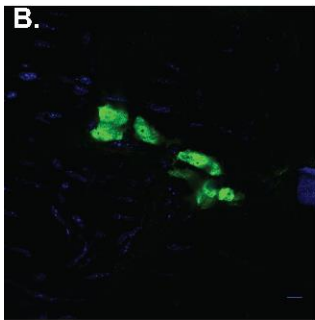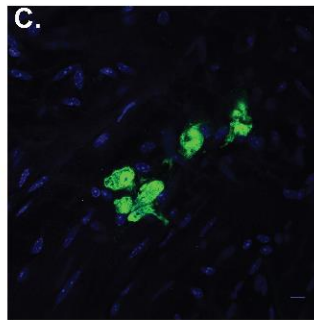

D.

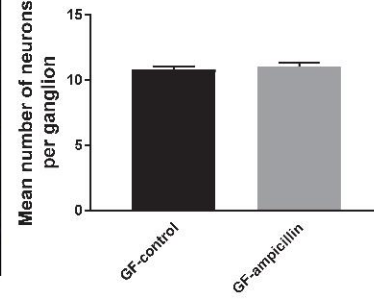

Supplement: NIHMS1580692-supplement-6.pdf [file NIHMS1580692-supplement-6.pdf]

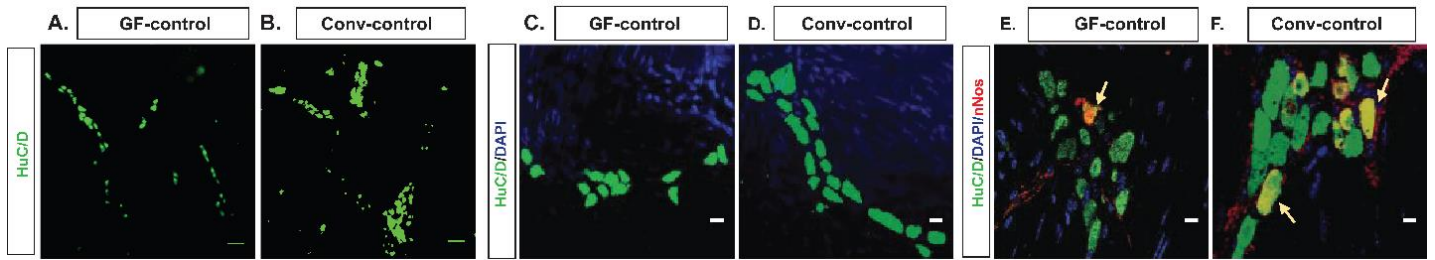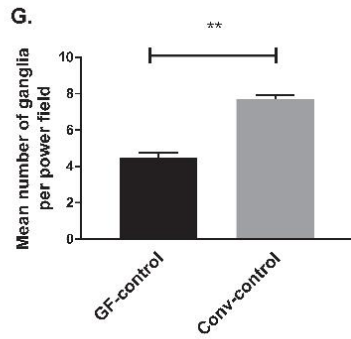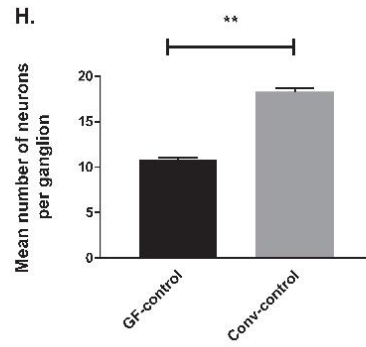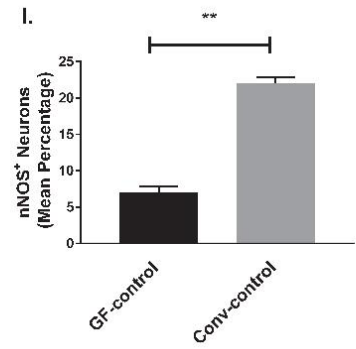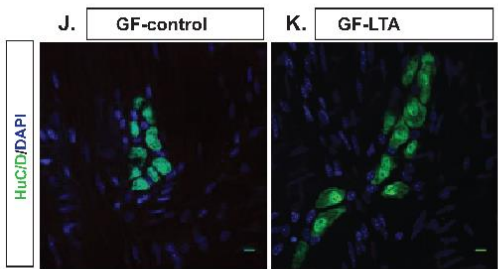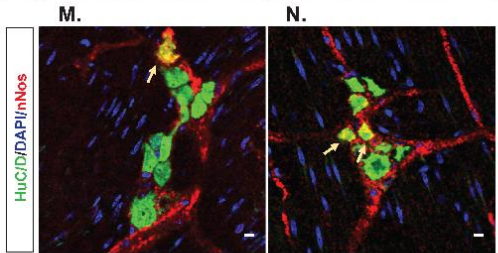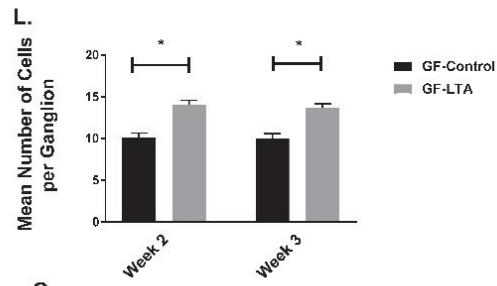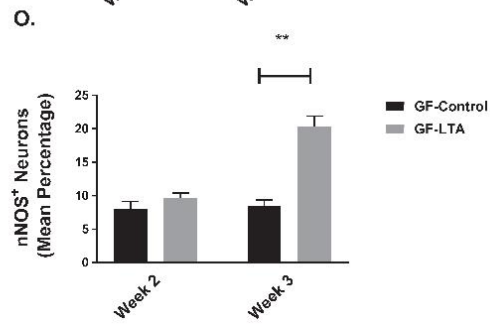

Supplement: NIHMS1580692-supplement-7.pdf [file NIHMS1580692-supplement-7.pdf]

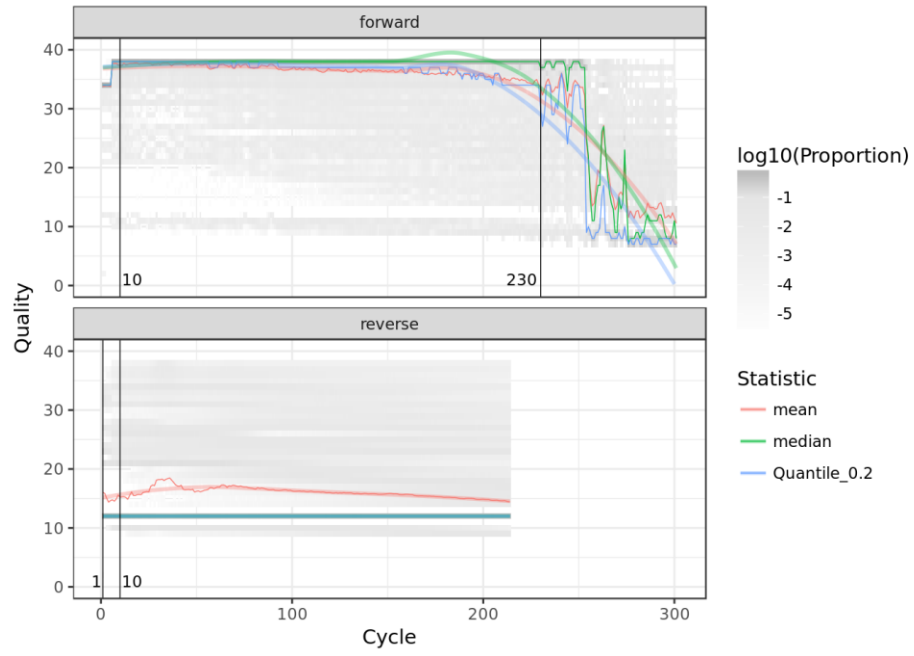

Supplement: NIHMS1580692-supplement-8.pdf [file NIHMS1580692-supplement-8.pdf]
